# Supplementary material for: Balanced SET levels favor the correct enhancer repertoire during cell fate acquisition
Source: PubMed Central journal article supplement (PMC10239470; doi:10.1038/s41467-023-39043-x), 2023-06-03
Supplement: 41467_2023_39043_MOESM1_ESM.pdf [file 41467_2023_39043_MOESM1_ESM.pdf]

1 **SUPPLEMENTARY INFORMATION of the manuscript “Balanced SET levels favor the**  
2 **correct enhancer repertoire during cell fate acquisition” by Zaghi et al.,**

3

4 **SUPPLEMENTARY FIGURES**

5

## Supplementary Figure 1

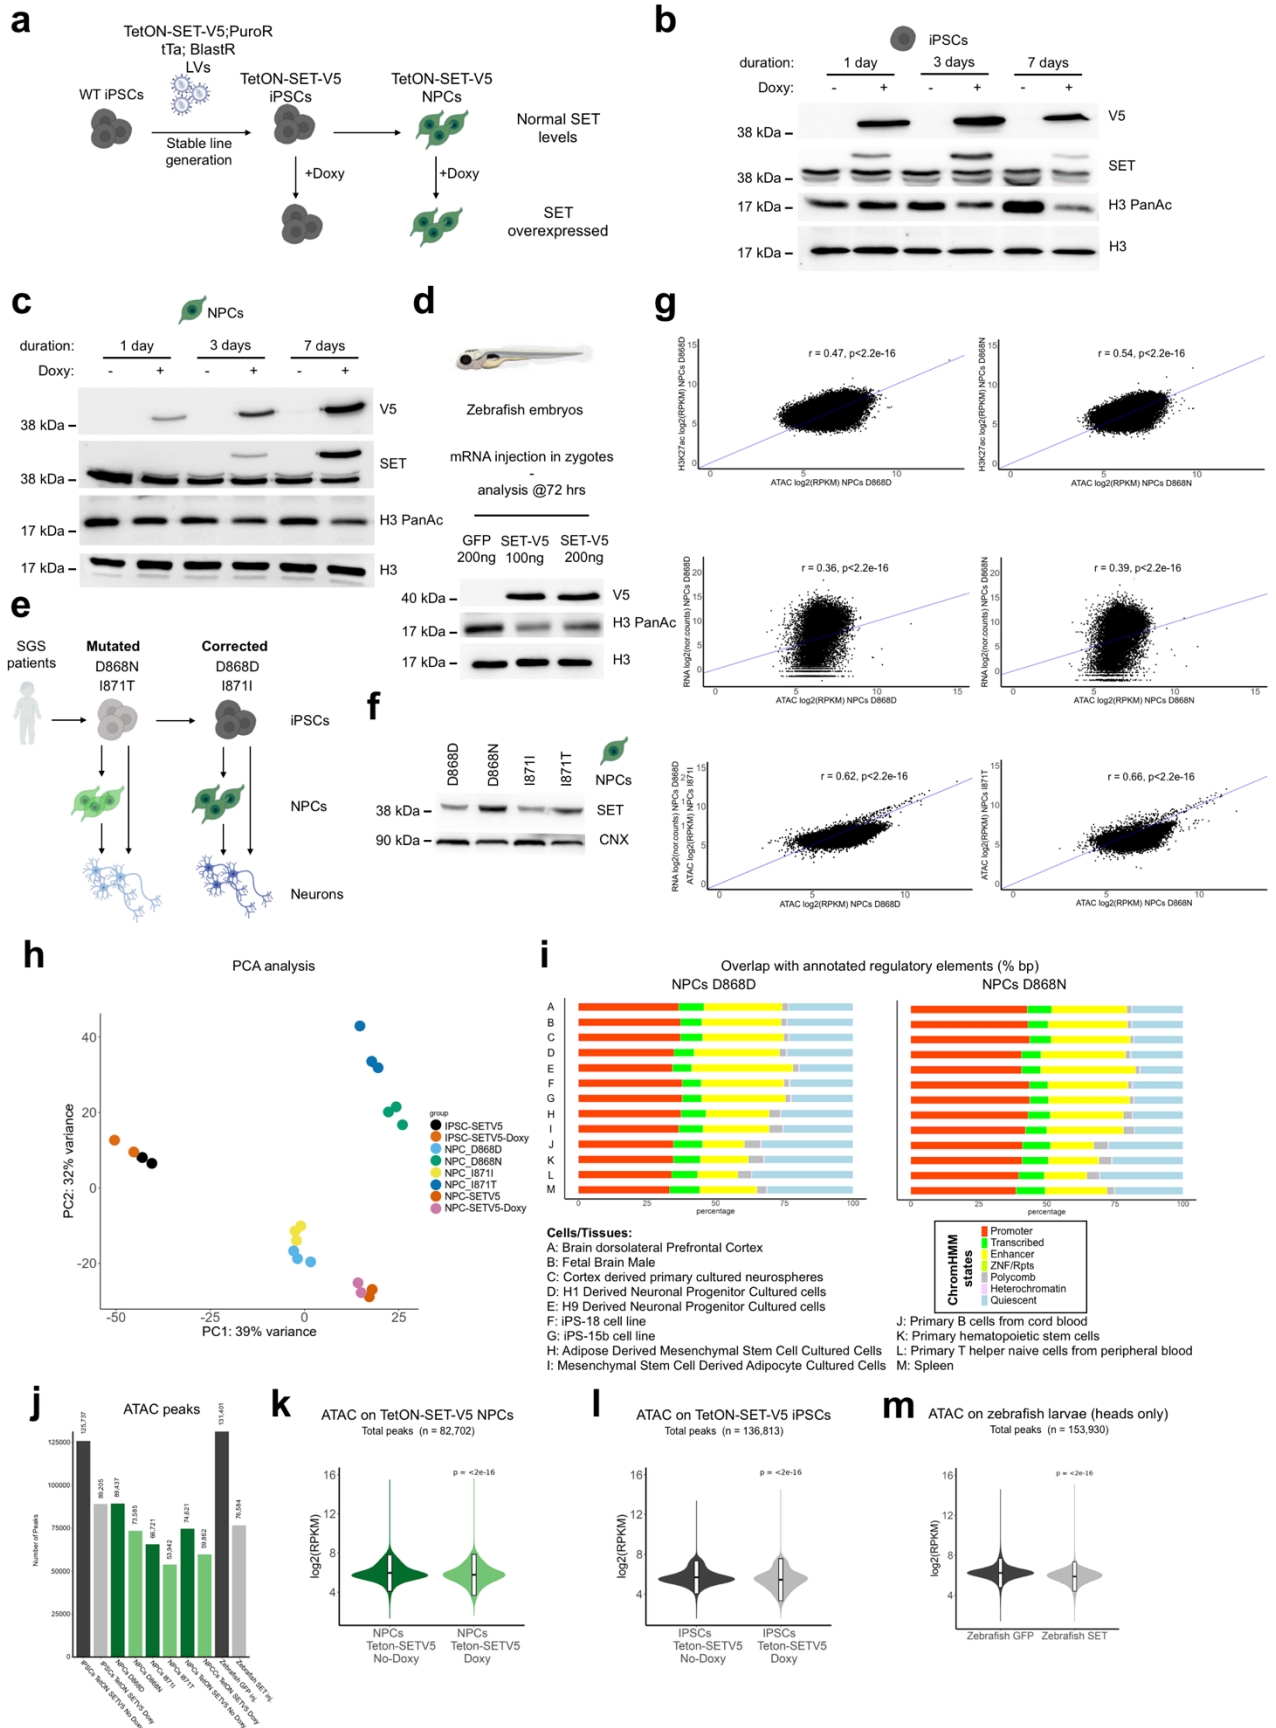

1 **Supplementary Fig. 1 | SET overexpression alters histone acetylation *in vitro* and *in vivo*.** **a**,  
2 Schematic strategy to generate inducible SET-V5 tagged overexpressing iPSCs and NPCs. Created  
3 with BioRender.com. **b, c**, Western blot for SET-V5 tagged form, total SET and H3 global  
4 acetylation levels in control (- doxy day 1, 3, 7) and overexpressing (+ doxy day 1, 3, 7) iPSCs and  
5 NPCs. H3 was used as loading control. Drawings created with BioRender.com. **d**, Western blot  
6 analysis for SET-V5 tagged form and H3 global acetylation levels in zebrafish control (200ng GFP  
7 mRNA injected) or overexpressing condition (100 ng and 200 ng SET-V5 mRNA injected). H3 was  
8 used as loading control. Drawing created with BioRender.com. **e**, Experimental scheme showing SGS  
9 patients and isogenic controls cell lines used in this work. Created with BioRender.com. **f**, Western  
10 blot analysis for SET protein expression in SGS patients derived NPCs. Calnexin (CNX) was used  
11 as loading control. Drawing created with BioRender.com. **g**, Pearson correlation between normalized  
12 ATAC-seq/H3K27ac ChIP-seq, ATAC-seq/RNA-seq signal of SGS (D868N) and control (D868D)  
13 NPCs, and normalized ATAC signal of control (D868D and I871I) and SGS (D868N & I871T) NPCs.  
14 **h**, Principal Component Analysis (PCA) of ATAC-seq samples including control (D868D, I871I,  
15 SETV5) and SET increased (D868N, I871T, SET-V5-doxy) conditions. **i**, ATAC-seq peaks of  
16 controls (D868D) and mutant (D868N) NPCs integration with available chromatin states from  
17 different tissues and cell lines. **j**, Number of ATAC-seq peaks found in each experimental condition  
18 analyzed. **k**, Violin plots of normalized signal of ATAC-seq in ATAC peaks of NPCs control (TetON-  
19 SET-V5 No-Doxy) and SET overexpressing (TetON-SET-V5 Doxy) peaks (n=82,702, Statistic two-  
20 sided Wilcoxon-test  $P < 2e-16$ . Boxplot with 25–75th percentiles, mean, and whiskers of minima to  
21 maxima) and **l**, control (TetON-SET-V5 No-Doxy) and SET overexpressing iPSCs (TetON-SET-V5  
22 Doxy) peaks (n=136,813, Statistic two-sided Wilcoxon-test  $P < 2e-16$ . Boxplot with 25–75th  
23 percentiles, mean, and whiskers of minima to maxima). **m**, Violin plots of normalized signal of  
24 ATAC-seq in peaks of control (GFP mRNA injected) and SET overexpressing zebrafish (SET-V5  
25 mRNA injected) (n=136,813, statistic two-sided Wilcoxon-test,  $P < 2e-16$ . Boxplot with 25–75th  
26 percentiles, mean, and whiskers of minima to maxima).

27

## Supplementary Figure 2

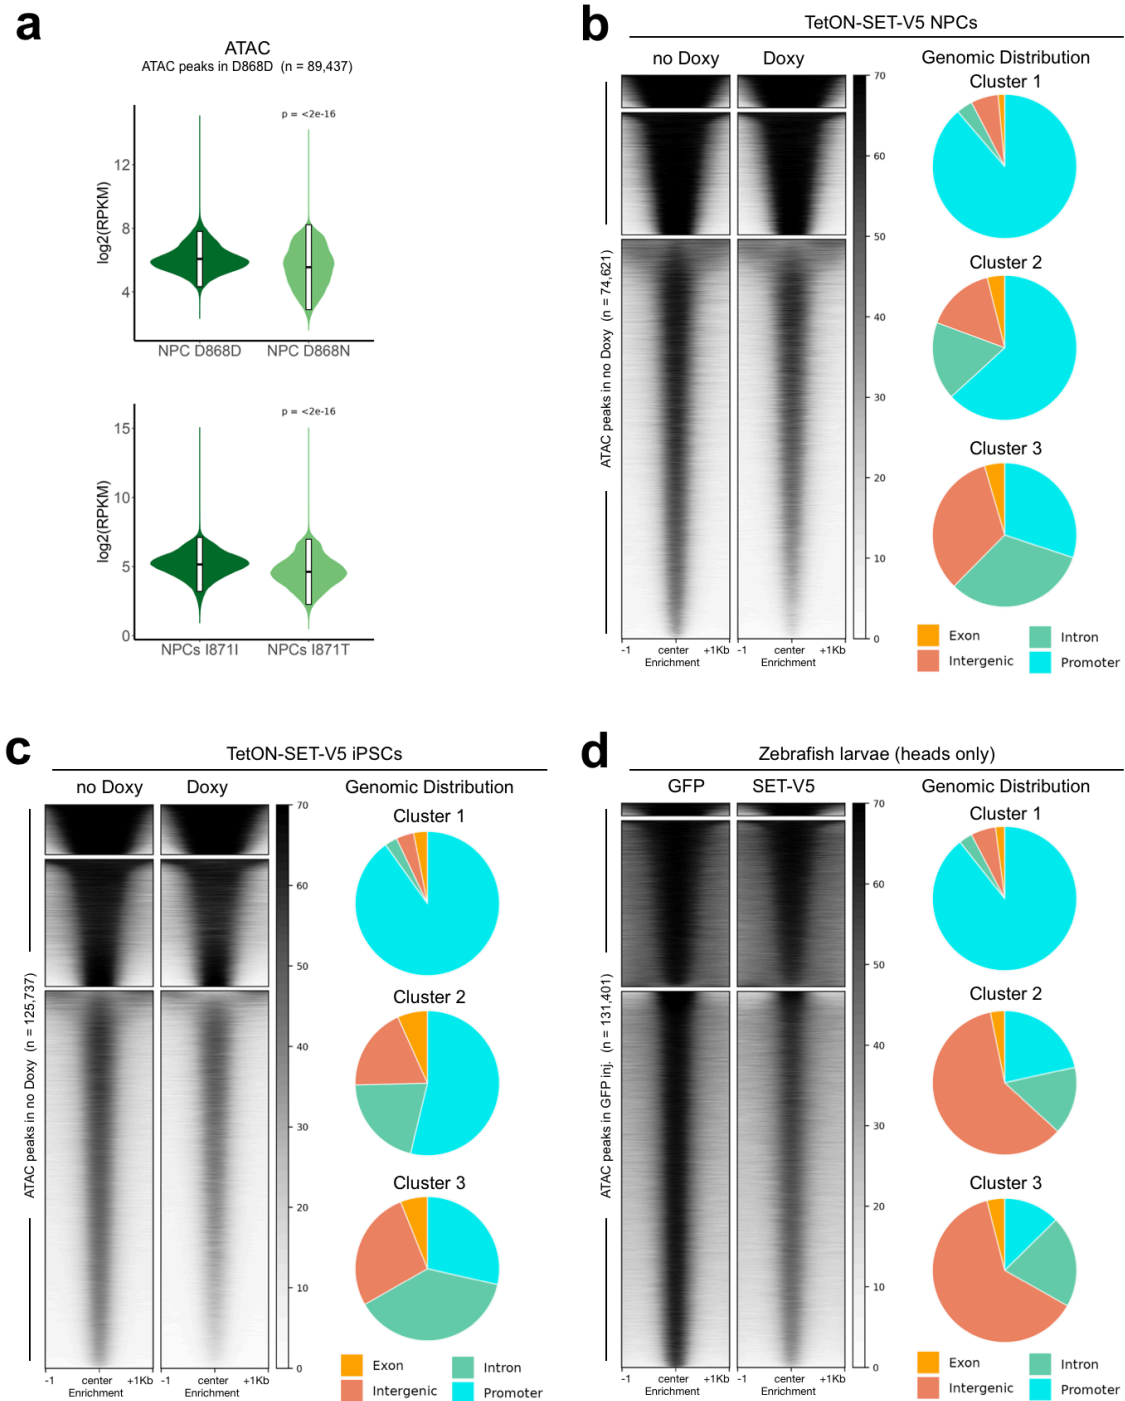

2

3 **Supplementary Fig. 2 | SET increased levels alter chromatin accessibility in different models.**4 **a**, Violin plots of normalized signal of ATAC-seq in peaks of NPCs control (D868D). Upper panel

5 NPCs D868D vs NPCs D868N. Lower panel NPCs I871I NPCs I871T (n=89,437, statistic two-sided

6 Wilcoxon-test  $P < 2e-16$ . Boxplot with 25–75th percentiles, mean, and whiskers of minima to maxima)7 **b**, Heatmap of ATAC-seq normalized signal in control NPCs (TetON-SET-V5 No-Doxy) peaks,

8 n=74,621. Regions are clustered using k-means (n=3), cluster1=4,165, cluster2=16,382,

1 cluster3=54,704. Piecharts representing the genomic distribution of regions inside the clusters. **c**,  
2 Heatmap of ATAC normalized signal in control iPSCs (TetON-SET-V5 No-Doxy) peaks,  
3 n=125,737. Regions are clustered using k-means (n=3), cluster1=11,616, cluster2=29,929,  
4 cluster3=84,192. Piecharts representing the genomic distribution of regions inside the clusters. **d**,  
5 Heatmap of ATAC normalized signal in control Zebrafish (GFP mRNA injected) peaks, n=131,401.  
6 Regions are clustered using k-means (n=3), cluster1=11,616, cluster2=29,929, cluster3=84,192.  
7 Piecharts representing the genomic distribution of regions inside the clusters.  
8

### Supplementary Figure 3

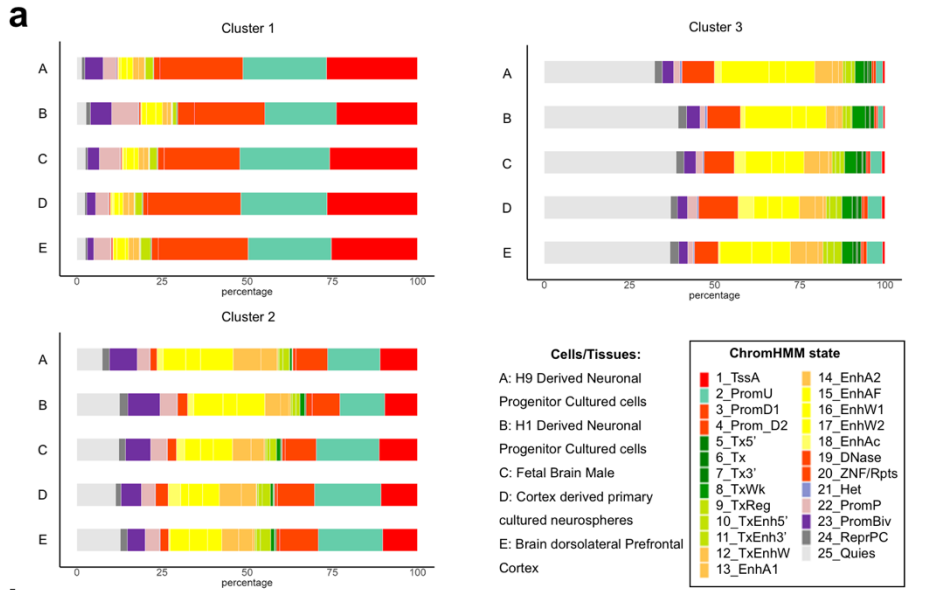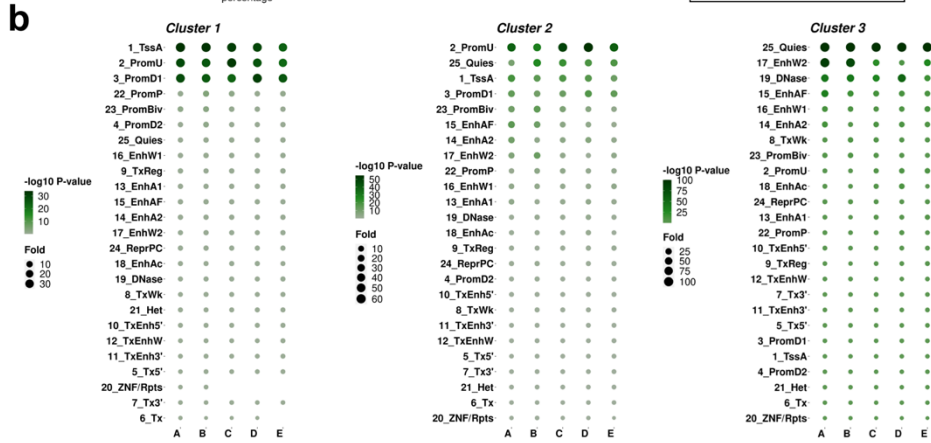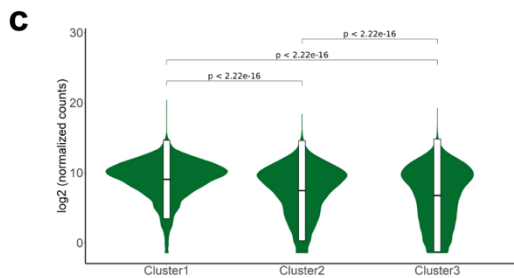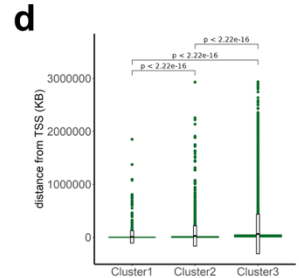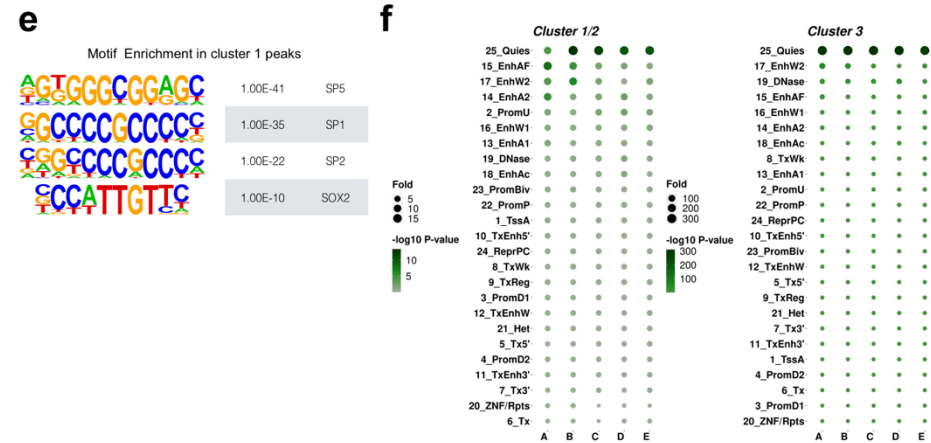

1 **Supplementary Fig. 3 | SET increased levels alter chromatin accessibility at distal regulatory**  
2 **regions. a**, Integration with publicly available chromatin states from different tissues and cell lines  
3 of the ATAC-seq peaks of the clusters of controls NPCs (D868D) as in **Fig. 2a. b**, Fold enrichment  
4 and statistical significance calculation of ChromHMM state enrichment presented in **(a)**. Statistic,  
5 Hypergeometric test. **c**, Violin plot showing the average expression levels of genes associated with  
6 ATAC-seq peaks in Cluster 1,2 and 3 in control NPCs (D868D) (statistic two-sided Wilcoxon-test;  
7 Cluster1 vs Cluster2,  $P < 2e-16$ ; Cluster 1 vs Cluster3,  $P < 2e-16$ ; Cluster 2 vs Cluster3,  $P < 2e-16$ ,  $n=3$   
8 independent experiment). **d**, Boxplot showing the average distance from TSS of the nearest gene for  
9 ATAC-seq peaks inside Clusters 1,2,3 in SGS NPCs (Cluster1  $n=8,033$ , Cluster2  $n=21,201$ , Cluster3  
10  $n=60,203$ , Statistic two-sided Wilcoxon-test. Cluster1 vs Cluster2  $P < 2e-16$ ; Cluster1 vs Cluster3  
11  $P < 2e-16$ ; Cluster2 vs Cluster3  $P < 2e-16$ . Boxplot with 25–75th percentiles, mean, and whiskers of  
12 minima to maxima). **e**, Homer motifs enrichment results in cluster1 of **Fig. 2a** result summary. **f**, Fold  
13 enrichment and statistical significance calculation of ChromHMM state enrichment in distal regions  
14 (intronic and intergenic) of Cluster1/2 (8426 regions) and Cluster3 (21201). Statistic two-sided  
15 Hypergeometric test.  
16

## Supplementary Figure 4

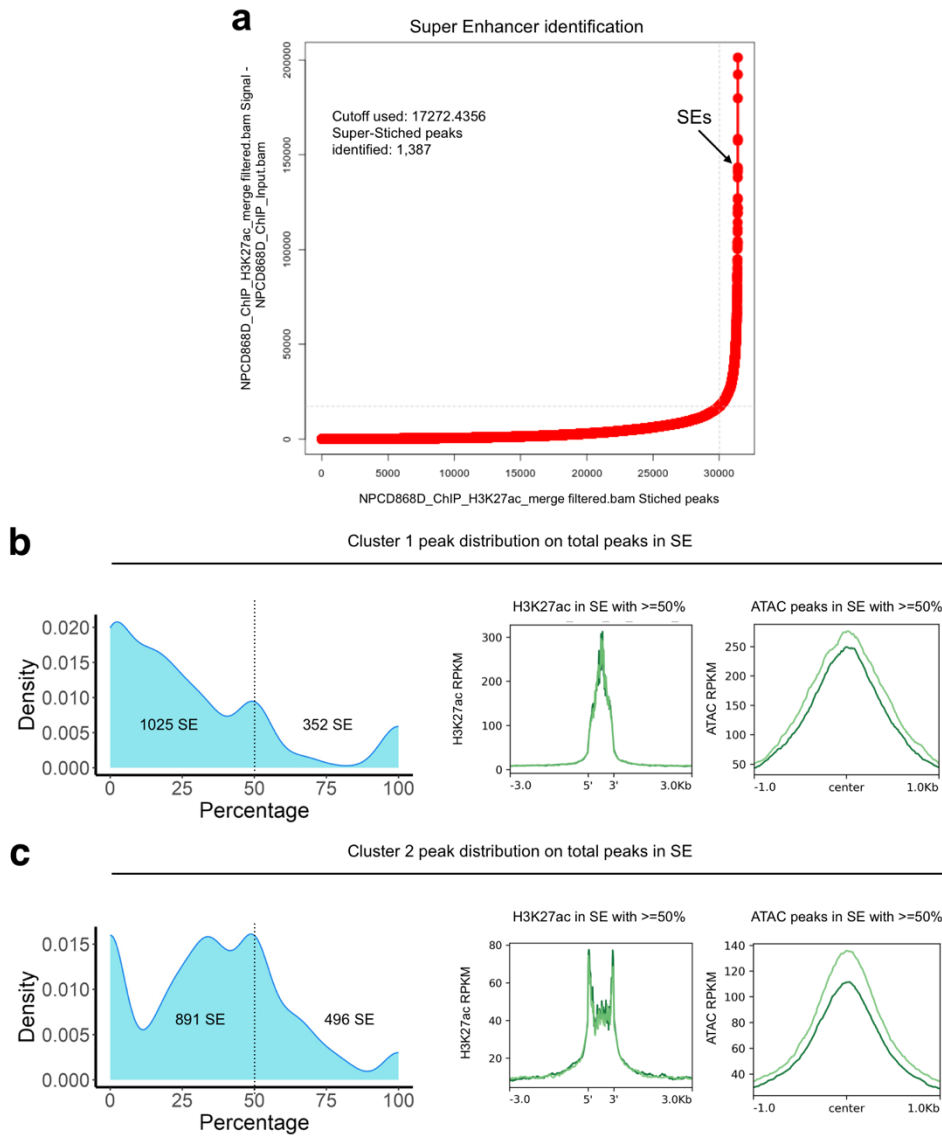

2

3 **Supplementary Fig. 4 | SET function in Superenhancers.** **a**, Summary plot of ROSE software  
 4 results showing the ratio between H3K27ac ChIP-seq signal in control (D868D) NPCs and its  
 5 respective input used to identify the Superenhancers (SEs) value cutoff starting from NPCs (D868D)  
 6 controls peaks,  $n=89,437$ . **b**, Right, density plot of SE based on the percentage of cluster 1 ATAC  
 7 peaks present inside each SE. Left, density plots showing H3K27ac ChIP-seq and ATAC-seq  
 8 normalized signal inside SEs with more than 50% of associated ATAC peaks belonging to cluster 1  
 9 of **Fig. 2a**,  $n=352$ . **c**, Right, density plot of SE based on the percentage of cluster 2 ATAC peaks  
 10 present inside each SE. Left, density plots showing H3K27ac ChIP-seq and ATAC-seq normalized  
 11 signal inside SEs with more than 50% of associated ATAC peaks belonging to cluster 2 of **Fig. 2a**,  
 12  $n=496$ .

13



## Supplementary Figure 5

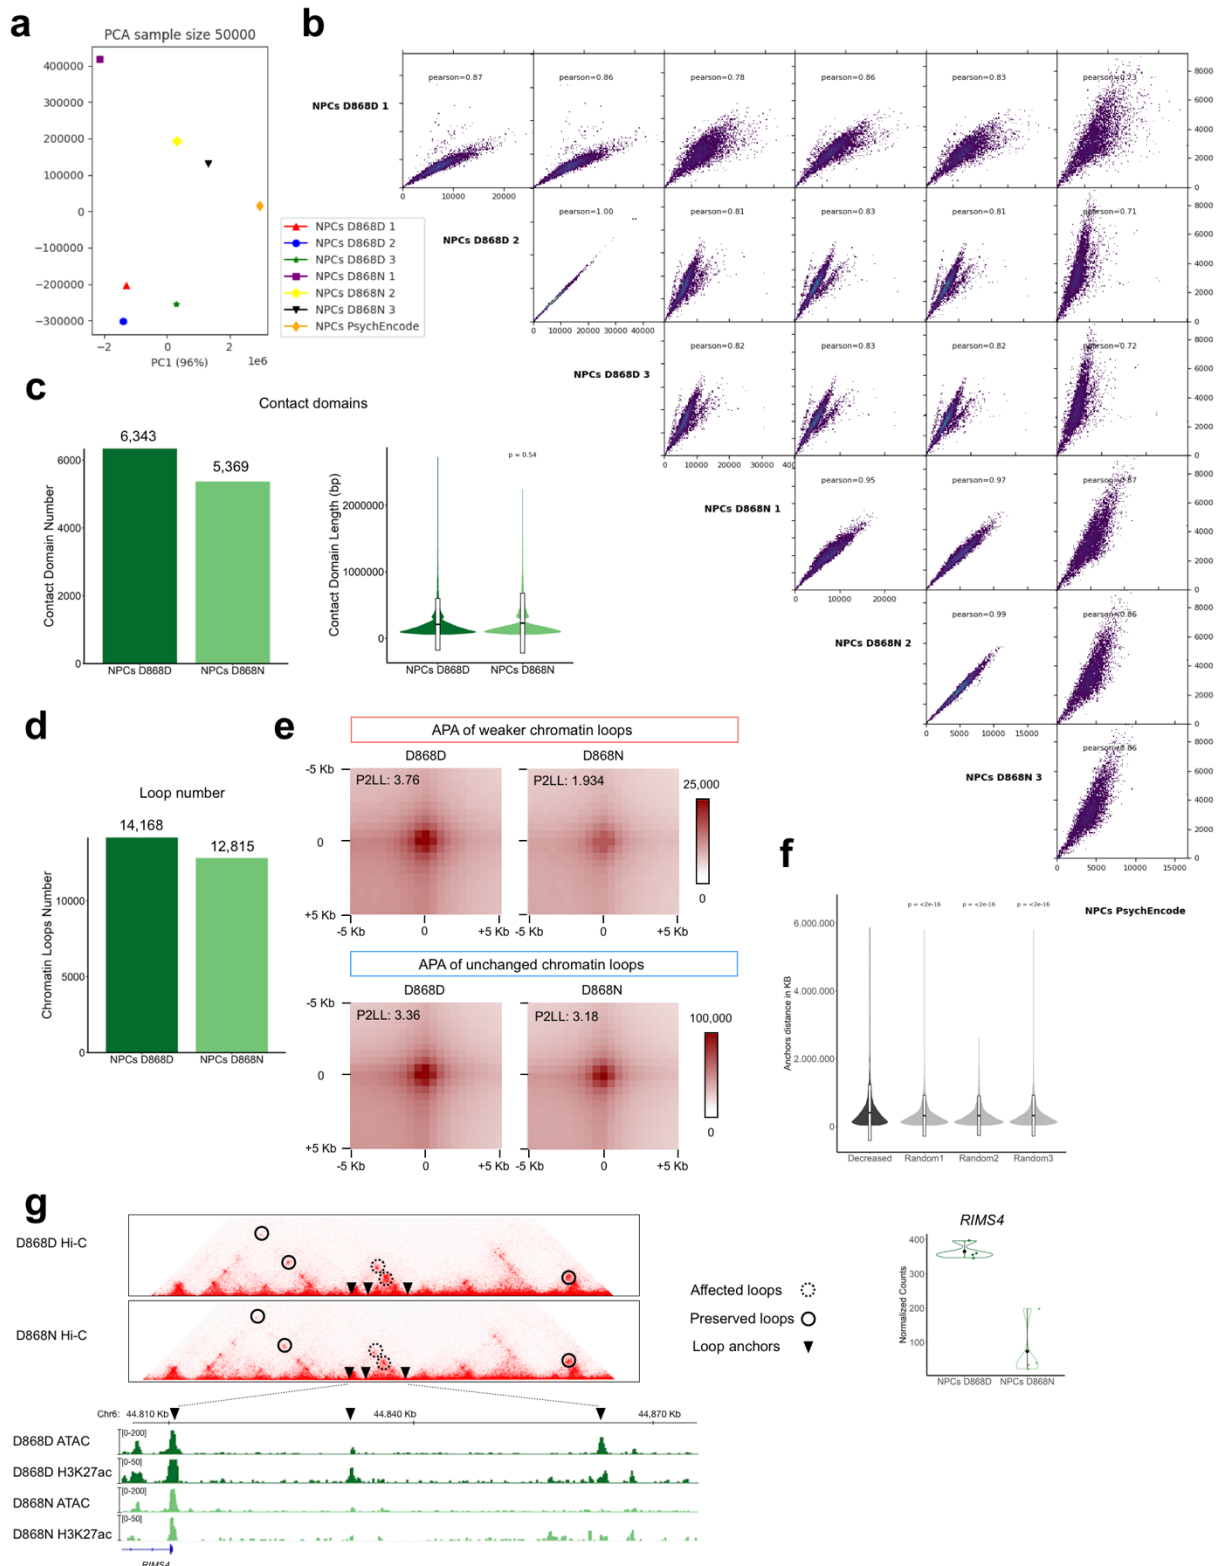

2

3 **Supplementary Fig. 5 | Chromatin structure is partially altered in SGS NPCs.** a, PCA of NPCs  
 4 Hi-C samples together with a NPC PsychEncode sample. b, Pearson correlation matrix of NPCs Hi-  
 5 C samples together with a NPC PsychEncode sample. c, Number (D868D n=6,343, D868N =5,369)  
 6 and length plots of contact domain in NPCs control (D868D) and mutant (D868N). The mean value

1 plus/minus the standard deviation is plotted in the violin plot (statistic two-sided Wilcoxon-test,  
2  $P < 2e-16$ . Boxplot with 25–75th percentiles, mean, and whiskers of minima to maxima). **d**, Bar plot  
3 of loop number (D868D  $n=14,168$ , D868N  $=12,815$ ). **e**, APA plots of decreased strength chromatin  
4 loops ( $n=2,978$ ) and unchanged ( $n=11,190$ ) in control (D868D) and mutant (D868N) NPCs. **f**, Violin  
5 plot of loop length comparing the length of decreased strength loop ( $n=2,978$ ) and 3 subsamples  
6 containing the same loop number randomly chosen between the unchanged loops. The mean value  
7 plus/minus the standard deviation is plotted in the violin plot. Statistic, Wilcoxon-test. **g**, Left,  
8 genomic locus of *RIMS4* gene showing interaction frequencies maps with underlined chromatin loops  
9 and genome browser of ATAC-seq and H3K27ac ChIP-seq of control (D868D) and mutant (D868N).  
10 Right, Mean RNA expression level of *RIMS4* in control (D868D) and mutant (D868N) NPCs is  
11 shown.

12

# Supplementary Figure 6

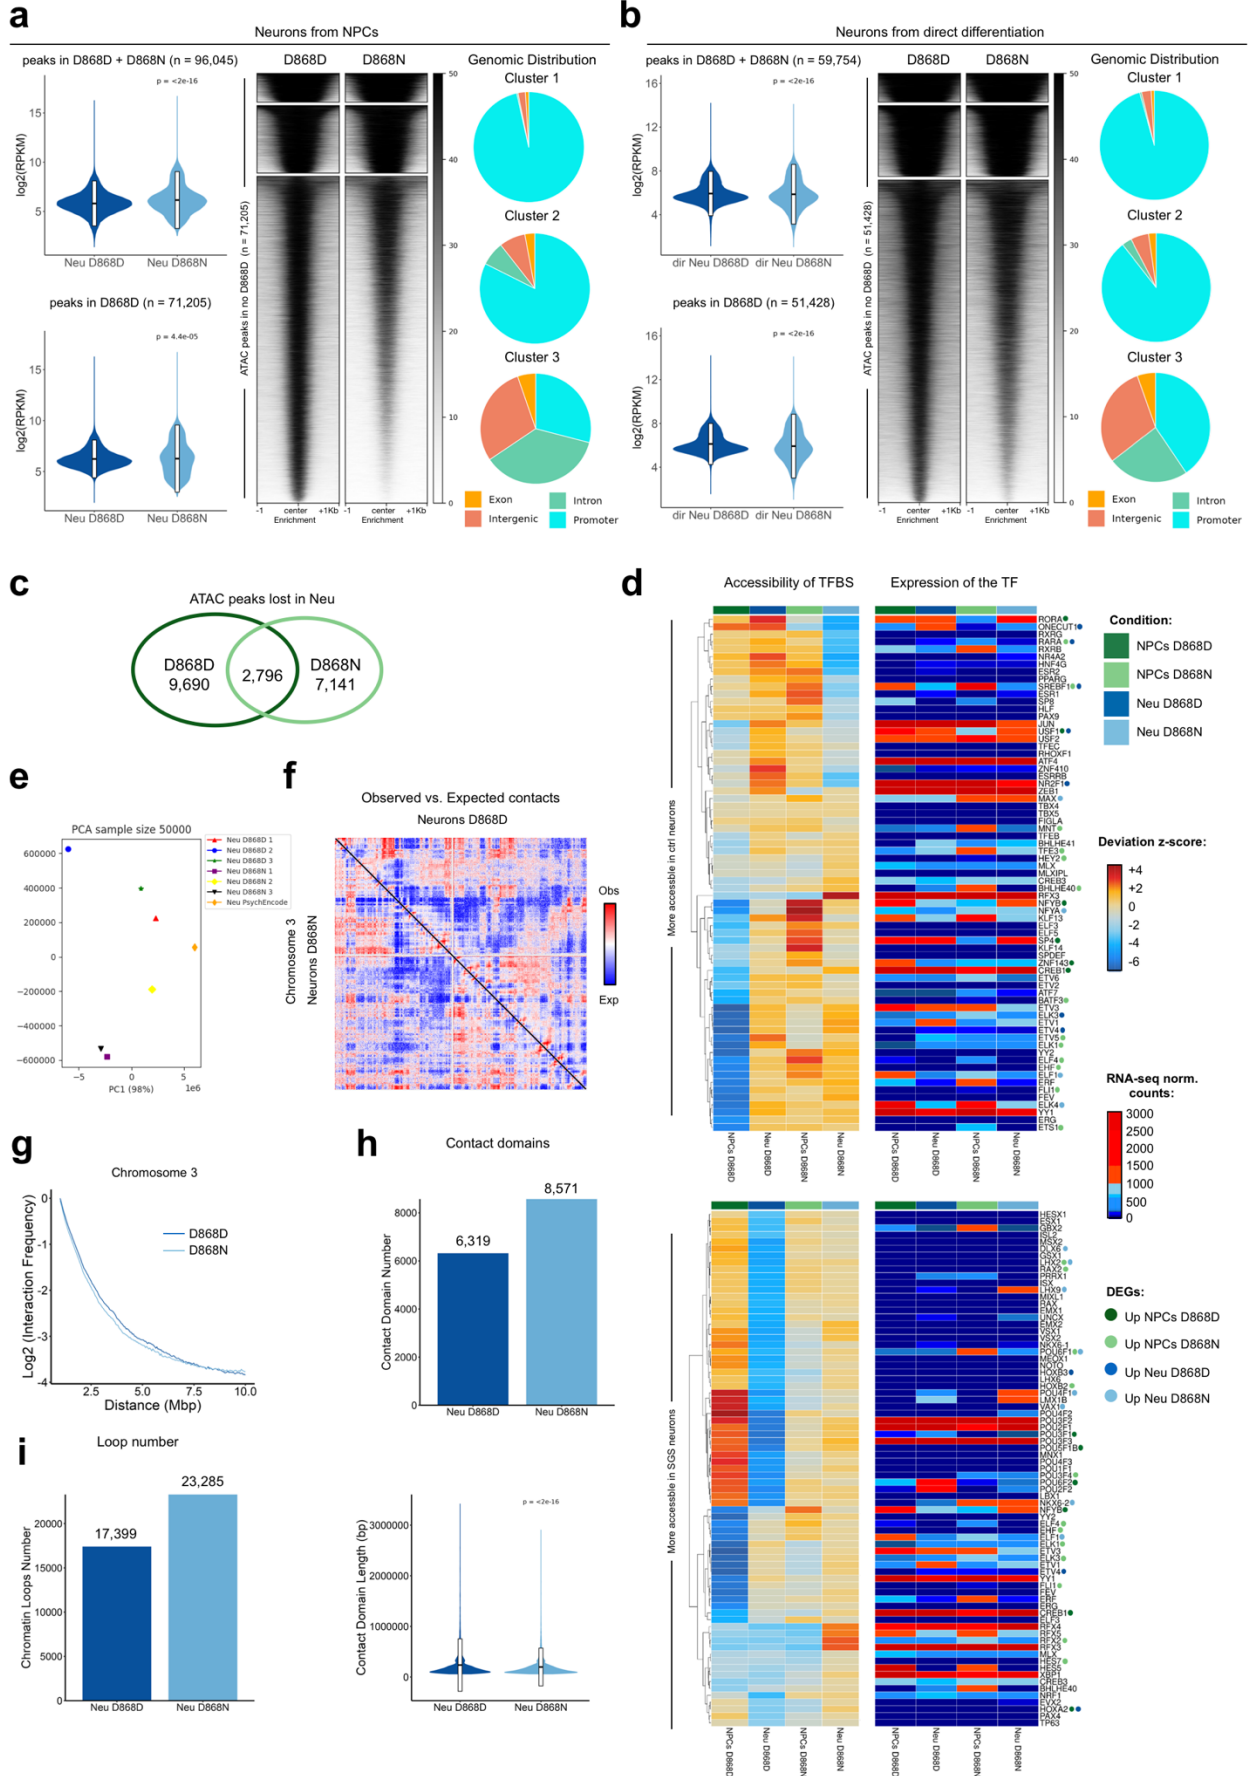

1 **Supplementary Fig. 6 | SGS neurons present a differential chromatin signature during**  
2 **development. a**, Violin plots of ATAC-seq normalized signal in NPC-derived neurons on all peaks  
3 found (control (D868D) + SGS (D868N) (top, n=96,045, statistic two-sided Wilcoxon-test,  $P < 2 \times 10^{-16}$ .  
4 Boxplot with 25–75th percentiles, mean, and whiskers of minima to maxima) and on control (D868D)  
5 only peaks (bottom, n=71,205, statistic two-sided Wilcoxon-test,  $P = 4.4 \times 10^{-5}$ . Boxplot with 25–75th  
6 percentiles, mean, and whiskers of minima to maxima). Heatmap with clusters (see methods) of  
7 ATAC-seq normalized signal in control (D868D) NPC-derived neurons peaks, n=71,205.  
8 Cluster1=4,817, cluster2=11,329, cluster3=55,060. Pie charts representing the genomic distribution  
9 of regions inside the clusters. **b**, Violin plots of ATAC-seq normalized signal in iPSC-derived neurons  
10 on all peaks (control (D868D) + SGS (D868N) (top, n=59,754, statistic two-sided Wilcoxon-test,  
11  $P < 2 \times 10^{-16}$ . Boxplot with 25–75th percentiles, mean, and whiskers of minima to maxima) and on control  
12 (D868D) only peaks (bottom, n=51,428, statistic two-sided Wilcoxon-test,  $P = 4.4 \times 10^{-5}$ . Boxplot with  
13 25–75th percentiles, mean, and whiskers of minima to maxima). Heatmap with clusters (see methods)  
14 of ATAC normalized signal in control (D868D) iPSC-derived neurons peaks, n=51,428.  
15 Cluster1=3,486, cluster2=8,634, cluster3=39,308. Pie charts representing the genomic distribution of  
16 regions inside the clusters. **c**, Venn diagram of overlapping peaks significantly downregulated in  
17 NPC-derived neurons during neural development in control (D868D) and mutant (D868N). **d**, Paired  
18 Heatmaps of TFBS deviations z-score and relative normalized counts expression level of the  
19 correspondent gene (upper part: TFBS more accessible in control neurons; lower part: TFBS more  
20 accessible in SGS neuron. Colored points next to TF name indicate if they are upregulated as  
21 indicated in legend. **e**, PCA of Hi-C neurons samples together with a PsychEncode sample. **f**,  
22 Normalized observed/expected interaction frequency map (Chr3) comparing control (D868D) and  
23 mutant (D868N) neurons. **g**, Summary plot of interaction frequency value and the contact distance  
24 between bins at 50kb resolution comparing control (D868D) and mutant (D868N) neurons. **h**,  
25 Number (top, D868D n=6,319, D868N =8,571) and length plots (bottom) of contact domain in control  
26 (D868D) and mutant (D868N) neurons (statistic two-sided Wilcoxon-test,  $P < 2 \times 10^{-16}$ . Boxplot with  
27 25–75th percentiles, mean, and whiskers of minima to maxima). **i**, Bar plot of loop number (D868D  
28 n=17,399, D868N =23,285).

29

## Supplementary Figure 7

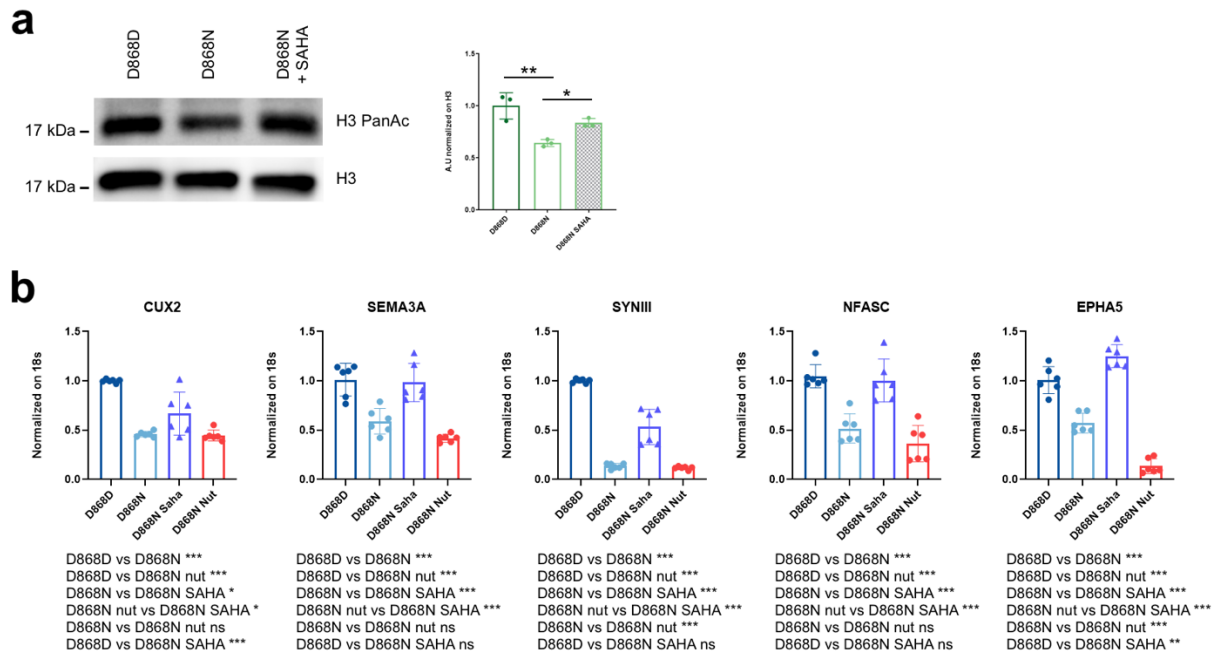

2

3 **Supplementary Fig. 7 | HDACs inhibition partially rescues SGS phenotype.** **a**, Western blot for  
4 H3PanAc levels on NPCs control (D868D), mutant (D868N) and mutant treated with SAHA and  
5 quantification. H3 was used as a loading control (statistic, one-way-ANOVA and one-sided Tuckey  
6 multiple comparison test, D868DvsD868N, \*\* P=0.0037, D868DvsD868N SAHA, ns, P=0.1017,  
7 D868N vs D868N SAHA, \* P=0.0545, n=3 independent experiments. Data are presented as mean  
8 values +/- SEM). **b**, Real-time quantitative PCR (RT-qPCR) for neuronal gene levels in NPC-derived  
9 neurons control (D868D), mutant (D868N) and mutant treated with SAHA or Nutlin. (*CUX2*, statistic  
10 one-way-ANOVA and one-sided Tuckey multiple comparison test, D868DvsD868N, \*\*\* P<0.0001,  
11 D868DvsD868N SAHA, \*\*\* P=0.0003, D868DvsD868N Nutlin, \*\*\* P<0.0001, D868NvsD868N  
12 SAHA, \* P=0.022, D868NvsD868N Nutlin, P= 0.9971, D868N SAHAvsD868N Nutlin, \*  
13 P=0.01473, (*SEMA3A*, statistic one-way-ANOVA and one-sided Tuckey multiple comparison test,  
14 D868DvsD868N, \*\*\* P=0.0003, D868DvsD868N SAHA, P=0.9842, D868DvsD868N Nutlin, \*\*\*  
15 P<0.0001, D868NvsD868N SAHA, \*\*\* P=0.0008, D868NvsD868N Nutlin, P= 0.1977, D868N  
16 SAHAvsD868N Nutlin, \*\*\* P<0.0001), (*SYNIII*, statistic one-way-ANOVA and one-sided Tuckey  
17 multiple comparison test, D868DvsD868N, \*\*\* P<0.0001, D868DvsD868N SAHA, \*\*\* P<0.0001,  
18 D868DvsD868N Nutlin, \*\*\* P<0.0001, D868NvsD868N SAHA, \*\*\* P<0.0001, D868NvsD868N  
19 Nutlin, P= 0.9858, D868N SAHAvsD868N Nutlin, \*\*\* P<0.0001), (*NFASC*, statistic one-way-  
20 ANOVA and one-sided Tuckey multiple comparison test, D868DvsD868N, \*\*\* P=0.0002,  
21 D868DvsD868N SAHA, P=9695, D868DvsD868N Nutlin, \*\*\* P<0.0001, D868NvsD868N SAHA,  
22 \*\*\* P=0.0005, D868NvsD868N Nutlin, P= 0.4216, D868N SAHAvsD868N Nutlin, \*\*\* P<0.0001),

1 (*EPHA5*, statistic one-way-ANOVA and one-sided Tuckey multiple comparison test,  
2 D868DvsD868N, \*\*\*  $P < 0.0001$ , D868DvsD868N SAHA,  $P = 0.0052$ , D868DvsD868N Nutlin, \*\*\*  
3  $P < 0.0001$ , D868NvsD868N SAHA, \*\*\*  $P < 0.0001$ , D868NvsD868N Nutlin, \*\*\*  $P < 0.0001$ , D868N  
4 SAHAvsD868N Nutlin, \*\*\*  $P < 0.0001$ ). N=6 independent experiments. Data are presented as mean  
5 values +/- SEM).

6

## Supplementary Figure 8

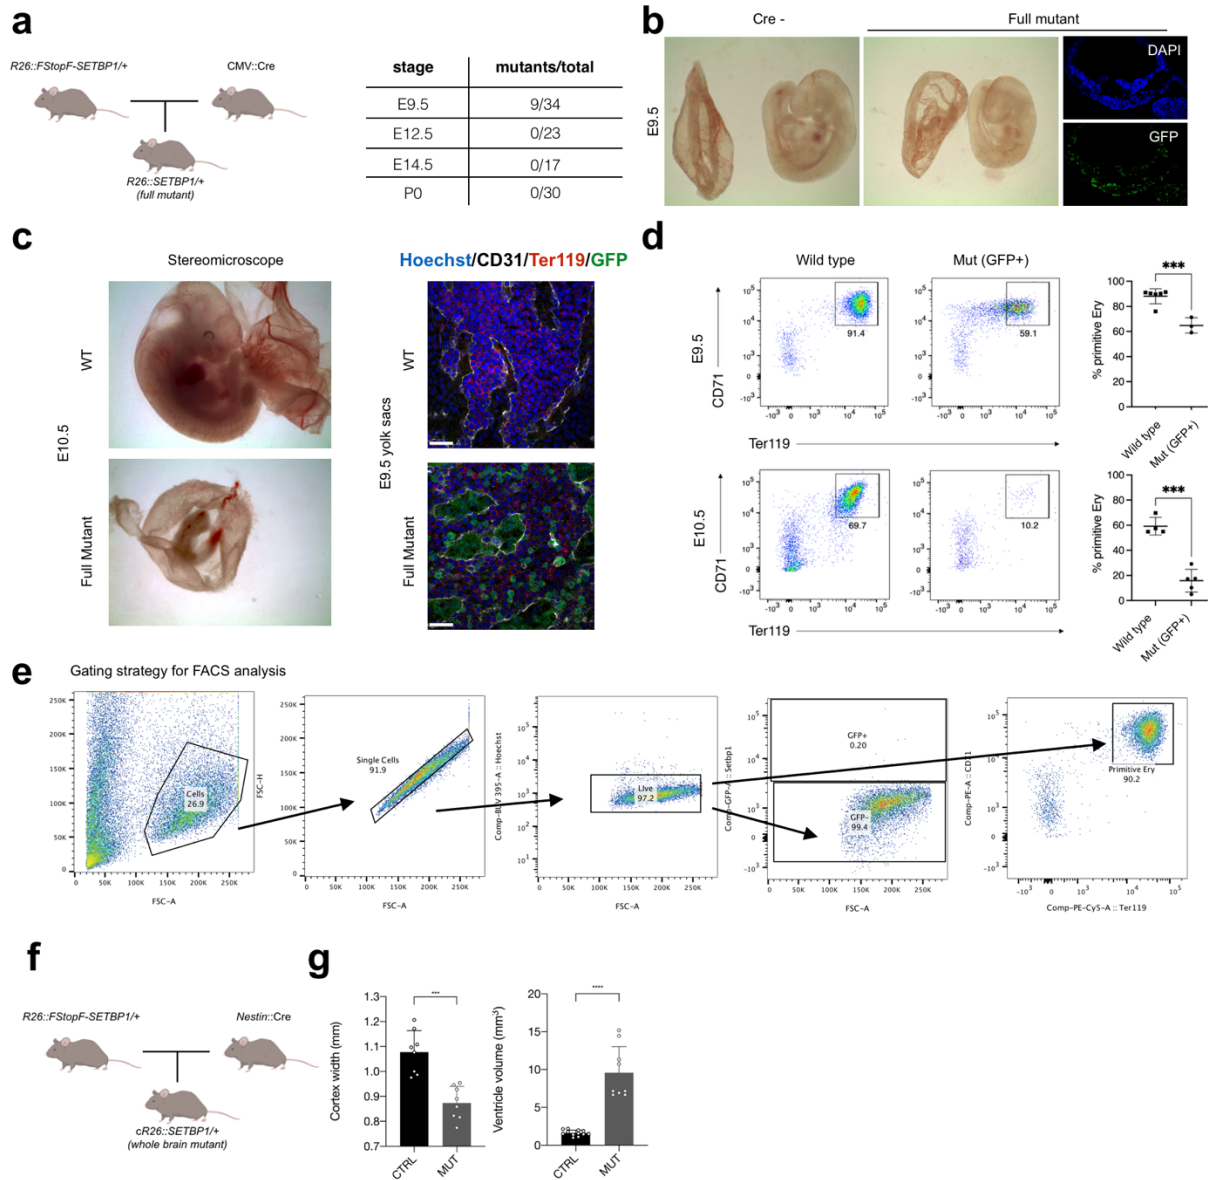

3 **Supplementary Fig. 8 | Whole body SETBP1 overexpression is lethal.** **a**, Schematic representation  
 4 of genetic crossing of CMV::Cre and *Rosa26-LoxP-STOP-LoxP-hSETBP1<sup>G870S</sup>* mice to obtain full  
 5 mutants, and summary table of survival proportion at different time point. Drawings created with  
 6 BioRender.com. **b**, Brightfield images of control (Cre-) and full mutant (CMV::Cre+) embryos at  
 7 E9.5. On the right, immunofluorescence staining for GFP in mutant embryos, show correct expression  
 8 of the exogenous cassette. **c**, Left, brightfield images of control and full mutant embryos at E10.5.  
 9 Panels on the right show whole mount confocal images of yolk sacs of E9.5 embryos of the same  
 10 genotypes, immunostained with Hoechst, CD31 (vasculature), Ter119 (erythrocytes) and GFP.  
 11 Mutant yolk sacs show a reduced number of erythrocytes within the yolk sac vascular plexus. Bars =  
 12 30  $\mu$ m. **d**, Flow cytometry analysis of E9.5 (top) and E10.5 (bottom) control and full mutant yolk

1 sacs, stained with CD71 and Ter119 antibodies. Dead cells were excluded by Hoechst 33258 dye  
2 incorporation. The percentage of double positive CD71+ Ter119+ cells was evaluated within live  
3 cells for control yolk sacs and within live GFP+ cells for mutant yolk sacs, and is quantified in the  
4 graphs on the right (E9.5, statistic two-sided t-test, \*\*\* P< 0.0001, n=6 for wild type and n=3 for  
5 GFP+ independent embryos; E10.5, statistic t-test, \*\*\* P< 0.0001, n=4 for wild type and n=5 for  
6 GFP+ independent embryos. Data are presented as mean values +/- SEM). **e**, Gating strategy for  
7 FACS analysis in E9.5 and E10.5 embryos on control (CRE+) and mutant (CRE+). Cells were first  
8 filtered to exclude doublets and dead cells. Then live cells were first checked for GFP expression to  
9 confirm the correct genotype and then the percentage of primary endothelium cells was determined  
10 using Ter119 and CD71 markers. **f**, Schematic representation of genetic crossing of Nestin::Cre and  
11 *Rosa26-LoxP-STOP-LoxP-hSETBP1<sup>G870S</sup>* mice to obtain whole brain specific mutants. **g**, Bar plots  
12 of cortex width and ventricle volume of control and brain mutant mice (cortex width, statistic two-  
13 sided t-test, Control vs. Mutant, \*\*\* P<0.001, n=8 for CTRL and n=8 for MUT independent animals;  
14 ventricle volume, Control vs. Mutant, \*\*\* P<0.001, n=12 for CTRL and n=9 for MUT independent  
15 animals. Data are presented as mean values +/- SEM).

16



## Supplementary Figure 9

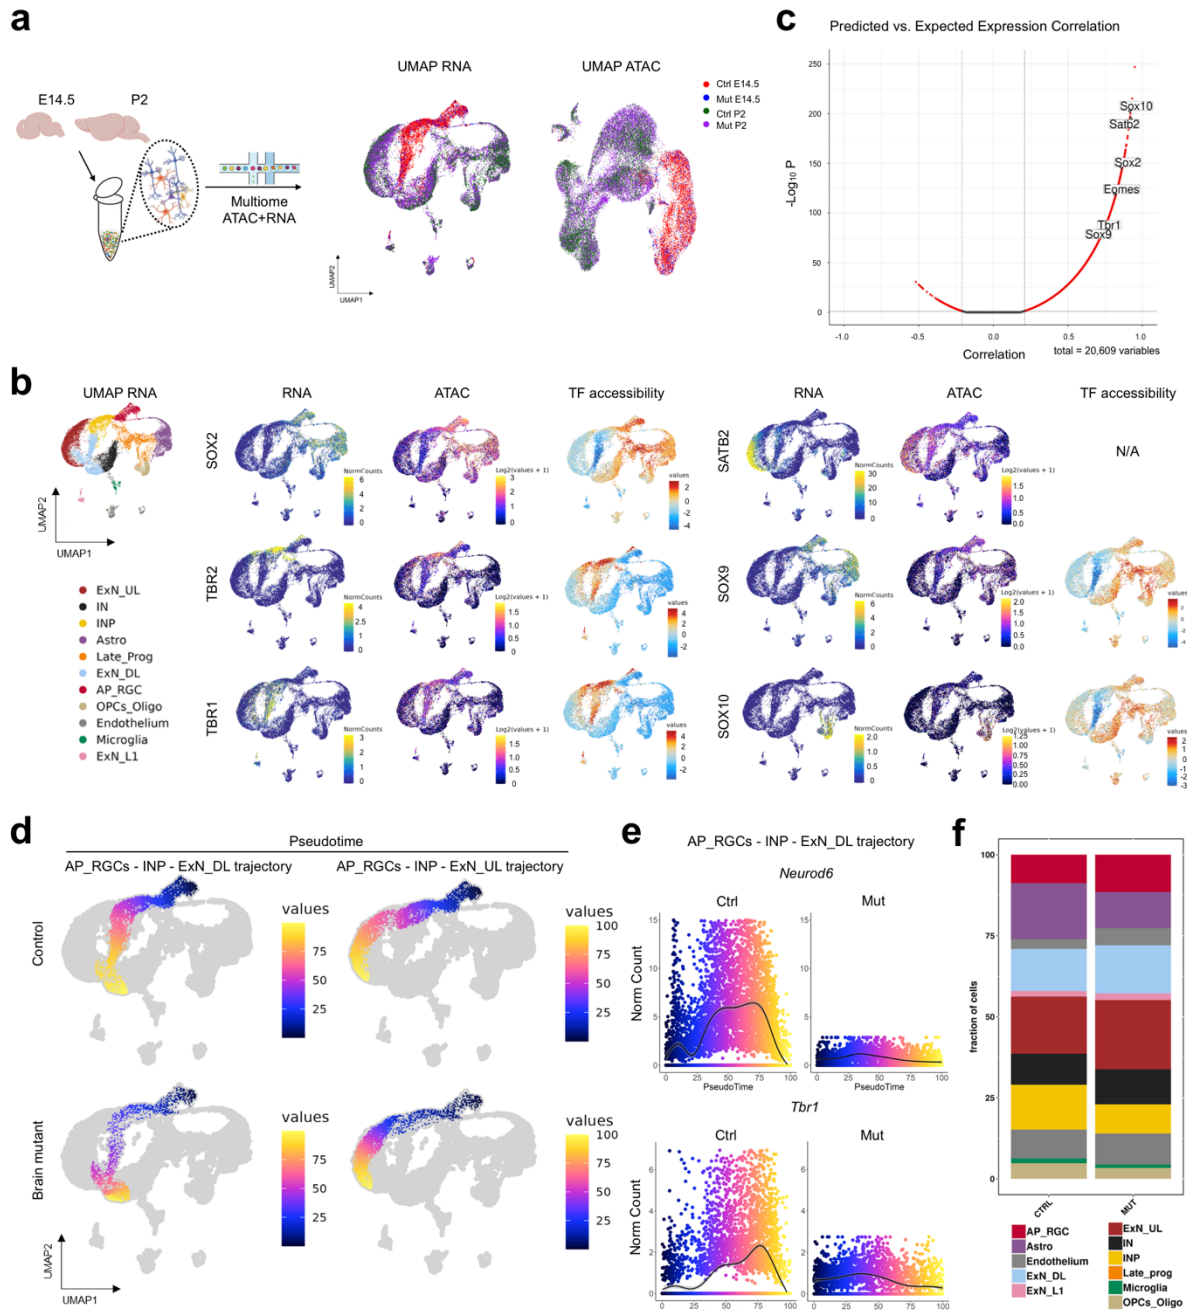

2

3 **Supplementary Fig. 9 | Brain SETBP1 overexpression alters chromatin dynamics.** **a**, Left,  
 4 Schematic representation of scMultiome experiment on E14.5 and P2 cortices. Created with  
 5 BioRender.com. Right, UMAP plots based on RNA (left) and ATAC (right) datasets with cells  
 6 colored by sample. **b**, RNA UMAP feature plot showing the expression levels, accessibility predicted  
 7 gene activity and TFBS accessibility level of typical neural cluster markers (SOX2, TBR2, TBR1,  
 8 SATB2, SOX10, SOX9). **c**, Volcano plot showing the correlation between predicted expression based  
 9 on ATAC-seq and actual gene expression for scRNA-seq data. Pearson correlation, Cut-off: P-  
 10 adjusted < 0.05, Correlation > 0.10, Correlation < 0.10. **d**, RNA dataset based UMAP plots with  
 11 ExN\_DL and ExN\_UL differentiation trajectory-associated cells colored by their pseudotime value

1 using control and brain mutant cells. **e**, Scatter plots showing the expression levels of *Neurod6* and  
2 *Tbr1* along AP\_RGCs -> ExN\_DL pseudotime trajectory. **f**, Stacked boxplot showing the normalized  
3 proportion of cells associated to each different cluster in the control and brain mutant genotype.  
4

### Supplementary Figure 10

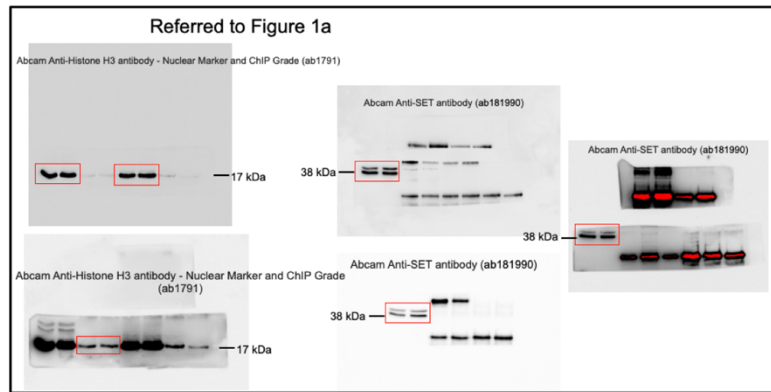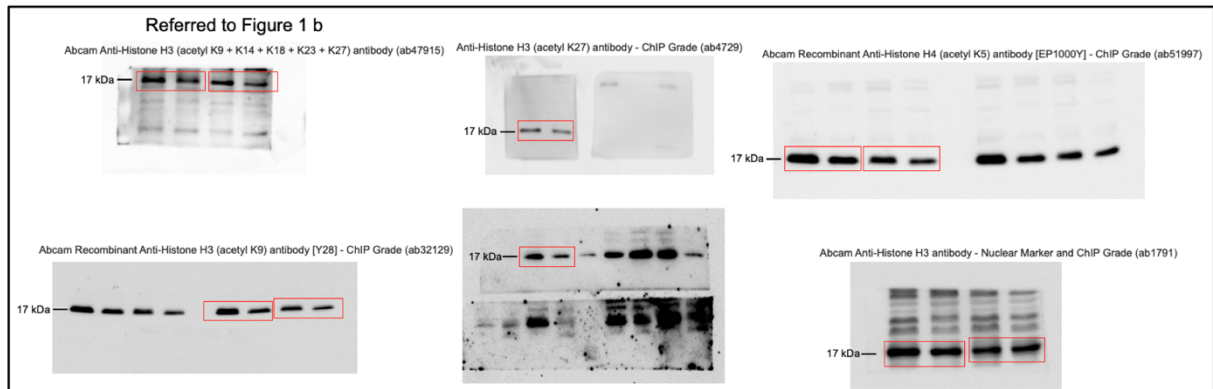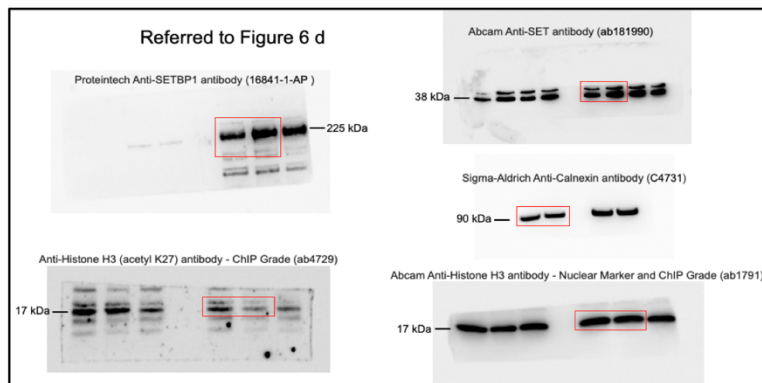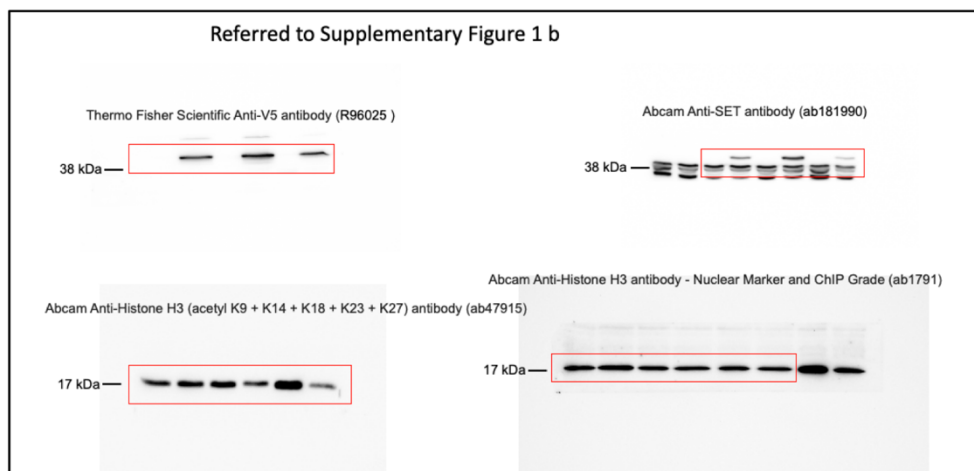

### Supplementary Figure 11

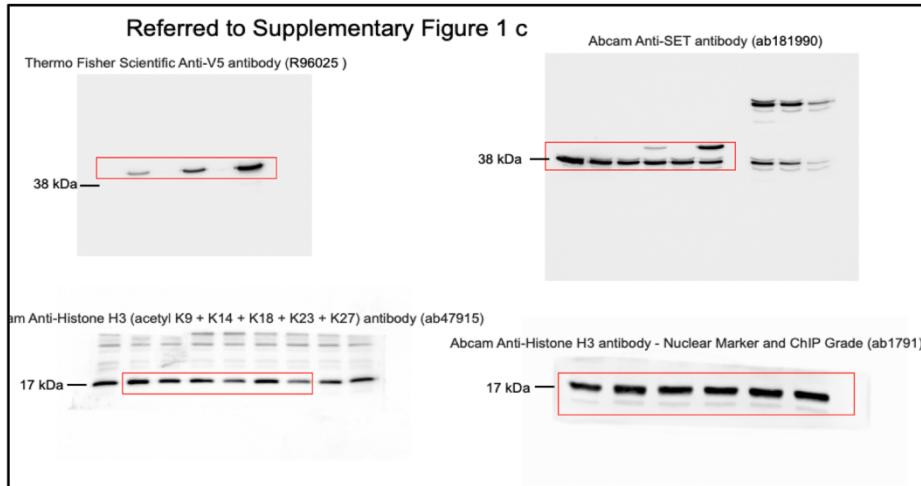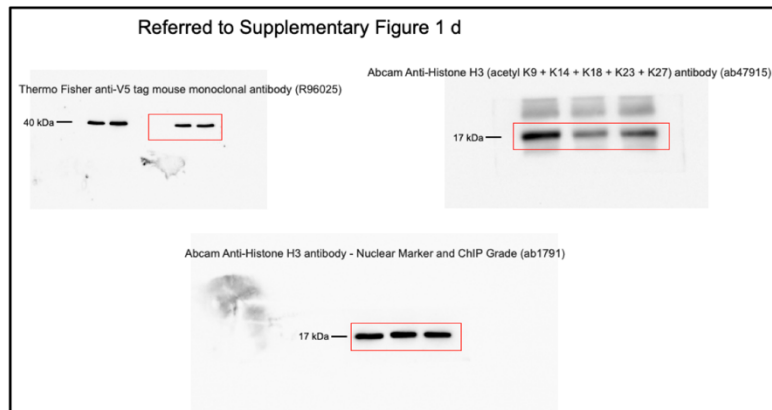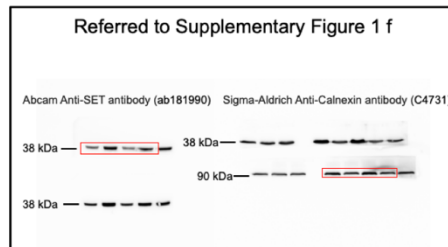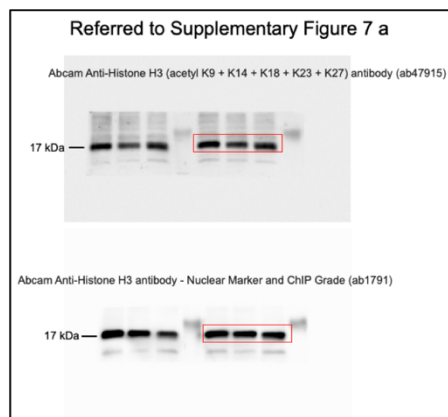

## 1 SUPPLEMENTARY TABLES

2

Supplementary Table 1

| NAME     | SPECIES | CATALOG                              | APPLICATION | DILUTION             |
|----------|---------|--------------------------------------|-------------|----------------------|
| SOX2     | Mouse   | R&D                                  | IF          | "1:200"              |
|          |         | ab59776                              |             |                      |
| TBR2     |         | Abcam                                | IF          | "1:200"              |
|          | Rabbit  | ab23345                              |             |                      |
| GFP      | Chicken | ThermoFisher<br>Scientific<br>A10262 | IF          | "1:1000"             |
| GFP      | Rabbit  | Thermo-<br>Fisher                    | IF          | "1:500"              |
|          |         | A11122                               |             |                      |
| CALNEXIN | Rabbit  | Sigma-<br>Aldrich                    | WB          | 1:2000, 5% MILK      |
|          |         | C4731                                |             |                      |
| SETBP1   | Rabbit  | Proteintech                          | WB          | 1:500, 5% MILK       |
|          |         | 16841-1-AP                           |             |                      |
| SET      | Rabbit  | Abcam                                | WB/IP/ChIP  | 1:500, 5% MILK,      |
|          |         | ab181990                             |             | ChIP/IP 5 micrograms |
| H3       | Rabbit  | Abcam                                | WB/IP       | 1:2000, 5% MILK,     |
|          |         | ab1791                               |             | IP 5 micrograms      |
| H3K27ac  | Rabbit  | Diagenode                            | ChIP        | 5 micrograms         |
|          |         | C15410196                            |             |                      |
| H3K27ac  | Rabbit  | Abcam                                | WB          | 1:500, 5% MILK       |
|          |         | Ab4729                               |             |                      |
| H3PanAC  | Rabbit  | Abcam                                | WB          | 1:500, 5% MILK       |
|          |         | ab47915                              |             |                      |
| H3K9ac   | Rabbit  | Abcam                                | WB          | 1:500, 5% MILK       |
|          |         | ab32129                              |             |                      |
| H4K5ac   | Rabbit  | Abcam                                | WB          | 1:1000, 5% MILK      |
|          |         | ab51997                              |             |                      |
| RFP      | Rabbit  | Voden                                | IF          | "1:400"              |

|                           |               |                           |             |                         |
|---------------------------|---------------|---------------------------|-------------|-------------------------|
|                           |               | <b>PM005</b>              |             |                         |
| <b>DCX</b>                | <b>Rabbit</b> | <b>Abcam</b>              | <b>IF</b>   | <b>"1:500"</b>          |
|                           |               | <b>ab18723</b>            |             |                         |
| <b>CD31</b>               | <b>Goat</b>   | <b>R&amp;D Systems</b>    | <b>IF</b>   | <b>"1:400"</b>          |
|                           |               | <b>AF3628</b>             |             |                         |
| <b>TER119</b>             | <b>Rat</b>    | <b>BioLegend</b>          | <b>IF</b>   | <b>"1:400"</b>          |
|                           |               | <b>116241</b>             |             |                         |
| <b>CD71-PE</b>            | <b>Rat</b>    | <b>BioLegend</b>          | <b>FACS</b> | <b>"1:100"</b>          |
|                           |               | <b>113808</b>             |             |                         |
| <b>TER119-<br/>PE-Cy5</b> | <b>Rat</b>    | <b>BioLegend</b>          | <b>FACS</b> | <b>"1:100"</b>          |
|                           |               | <b>116210</b>             |             |                         |
| <b>488</b>                | <b>Mouse</b>  | <b>Thermo-<br/>Fisher</b> | <b>IF</b>   | <b>"1:1000"</b>         |
|                           |               | <b>A11039</b>             |             |                         |
| <b>488</b>                | <b>Rabbit</b> | <b>Thermo-<br/>Fisher</b> | <b>IF</b>   | <b>"1:1000"</b>         |
|                           |               | <b>A21206</b>             |             |                         |
| <b>488</b>                | <b>Rat</b>    | <b>Thermo-<br/>Fisher</b> | <b>IF</b>   | <b>"1:1000"</b>         |
|                           |               | <b>A21208</b>             |             |                         |
| <b>546</b>                | <b>Rabbit</b> | <b>Thermo-<br/>Fisher</b> | <b>IF</b>   | <b>"1:1000"</b>         |
|                           |               | <b>A10040</b>             |             |                         |
| <b>555</b>                | <b>Rabbit</b> | <b>Thermo-<br/>Fisher</b> | <b>IF</b>   | <b>"1:1000"</b>         |
|                           |               | <b>A31752</b>             |             |                         |
| <b>647</b>                | <b>Goat</b>   | <b>Thermo-<br/>Fisher</b> | <b>IF</b>   | <b>"1:1000"</b>         |
|                           |               | <b>A21447</b>             |             |                         |
| <b>HOECHST</b>            |               | <b>SIGMA-<br/>Aldrich</b> |             | <b>"1:1000"</b>         |
|                           |               | <b>33258</b>              |             |                         |
|                           | <b>Goat</b>   | <b>DAKO</b>               | <b>WB</b>   | <b>1:10000, 5% MILK</b> |

|                        |             |                  |           |                         |
|------------------------|-------------|------------------|-----------|-------------------------|
| <b>HRP-<br/>MOUSE</b>  |             | <b>P044701-2</b> |           |                         |
| <b>HRP-<br/>RABBIT</b> | <b>Goat</b> | <b>DAKO</b>      | <b>WB</b> | <b>1:10000, 5% MILK</b> |
|                        |             | <b>P044801-2</b> |           |                         |

1

2 **Supplementary Table 1: List of antibodies.**

3 Complete recap of antibodies used in this work.

4

5

6 **Supplementary Table 2**

|            |                             |
|------------|-----------------------------|
| 18S_Fw     | 5'-GGTGAAATTCTTGACCGGC-3'   |
| 18S_Rev    | 5'-GACTTTGGTTTCCCGGAAGC-3'  |
| CUX2_Fw    | 5'-TGTCGGATGAGCAGAATGTA-3'  |
| CUX2_Rev   | 5'-GCGTCGTCTGAGCCTGTCTC-3'  |
| SEMA3A_Fw  | 5'-GCCTTATCAAGGAAGAGTCC-3'  |
| SEMA3A_Rev | 5'-GCAAAGGTTATAACATCATC-3'  |
| SYNIII_Fw  | 5'-ATCGGCCTGCAGTATGGAGG-3'  |
| SYNIII_Rev | 5'-ATGGTTGGGGAAAAAATGTTT-3' |
| NFASC_Fw   | 5'-GTGGCATGGACCTCCTGCTG-3'  |
| NFASC_Rev  | 5'-TCAAACCTGGCCTTATCAGA-3'  |
| EPHA5_Fw   | 5'-CTCACAGTTATACCCATGAG-3'  |
| EPHA5_Rev  | 5'-CCATTCCAGAAAGACACTAG-3'  |

7

8 **Supplementary Table 2: List of oligonucleotides.**

9 Complete recap of primers used in this work.

10
